# Supplementary material
Source: PubMed Central journal article supplement (PMC7504943)
Supplement: IAI.00270-20-s0001.pdf [file IAI.00270-20-s0001.pdf]

**A.** *E. faecalis* V583::*gfp* plasmid stability *in vivo*

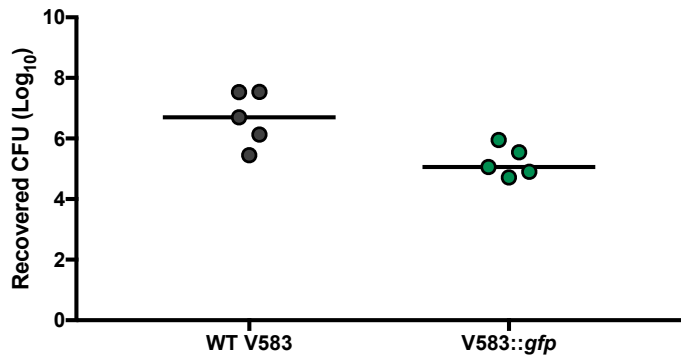

**B.**

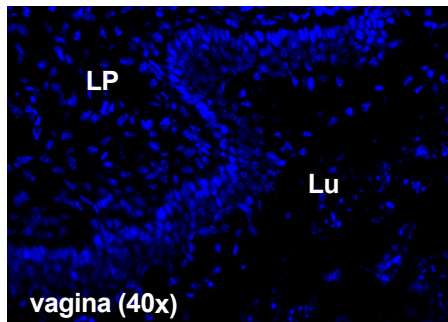

**C.**

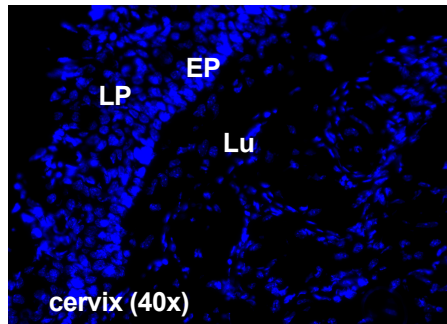

**D.**

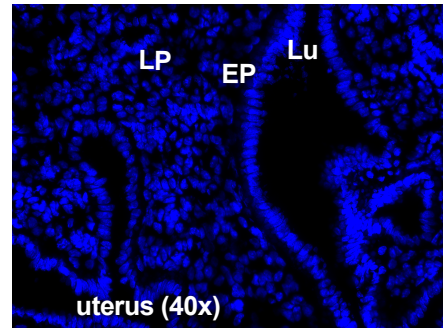

# Recovered CFU/Mouse

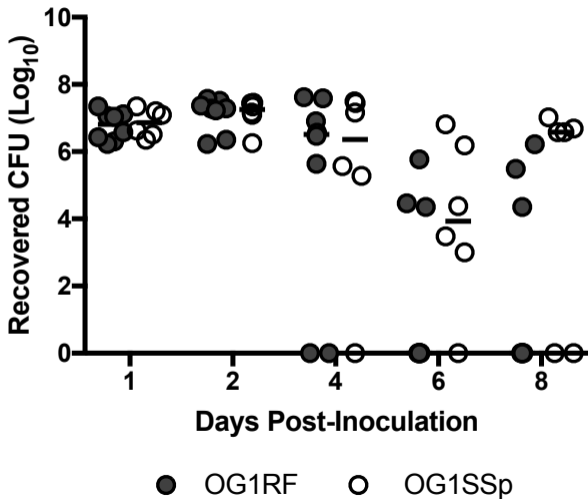

**Supplemental Figure 1: Colonization of *E. faecalis* V583::*gfp*.** (A) C57BL/6 mice were inoculated with either WT V583 or V583::pMV158GFP and the vaginal lumen was swabbed to quantify CFU. Data are presented as recovered CFU per swab. WT V583 was selected by plating on agar supplemented with gentamycin (100µg/ml) and V583::pMV158GFP was selected by plating on agar supplemented with gentamycin (100µg/ml) and tetracycline (15µg/ml) to determine GFP plasmid stability. (B, C, D) Naïve C57BL/6 mice were treated with β-estradiol and 7µm sections of vaginal (B), cervical (C) and uterine (D) tissue were stained with DAPI for fluorescence microscopy. Images were all taken at 40x magnification. LP = lamina propria, EP = epithelial layer, Lu = lumen.

**Supplemental Figure 2: Colonization and persistence of *E. faecalis* OG1- (RF and SSp).** C57BL/6 mice were co-inoculated with OG1RF WT and OG1SSp WT and the vaginal lumen was swabbed to quantify CFU. Data are presented as recovered CFU per swab. Data was analyzed using a Two-way ANOVA with multiple comparisons;  $P > 0.05$ .
